# Supplementary material for: Changes in the gut bacterial communities in colon cancer surgery patients: an observational study
Source: Springer Nature journal article supplement (doi:10.1186/s13099-021-00477-7), 2022-01-04

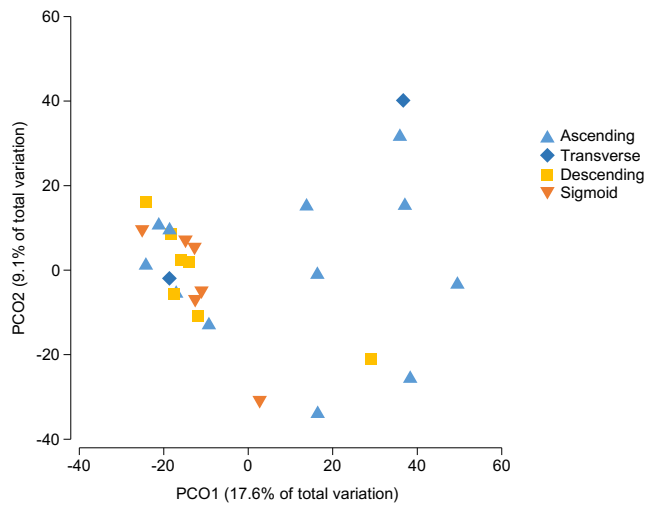

Supplement: MOESM2 [file 19999690]
